# Supplementary material
Source: MDPI journal article supplement (https://www.mdpi.com/2304-6740/9/12/88)
Supplement: s1 [file s1]

## Europium-Doped Y<sub>2</sub>O<sub>3</sub>-Coated Diatomite Nanomaterials: Hydrothermal Synthesis, Characterization, Optical Study with Enhanced Catalytic Performance

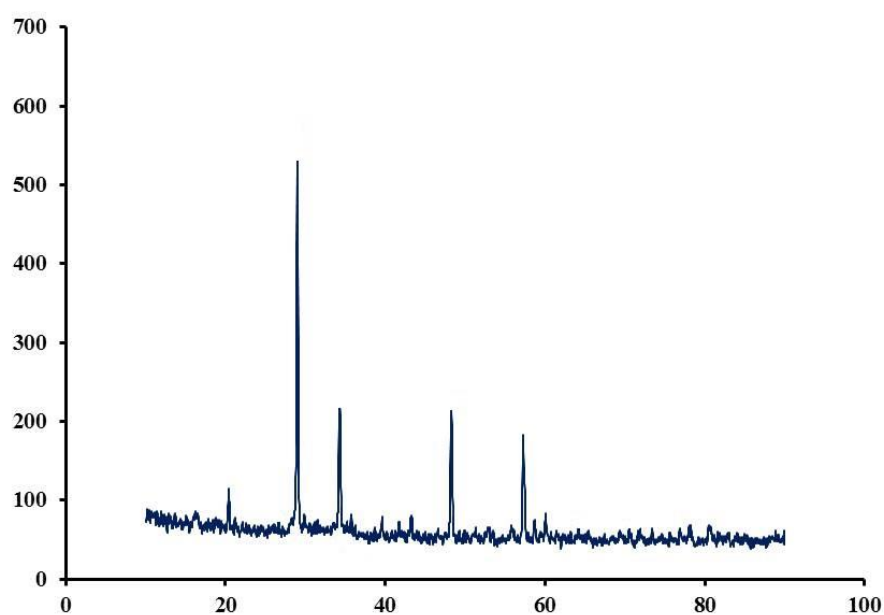

Figure S1. XRD pattern of diatom-coated with 6% Eu-doped Y<sub>2</sub>O<sub>3</sub> nanoparticles.

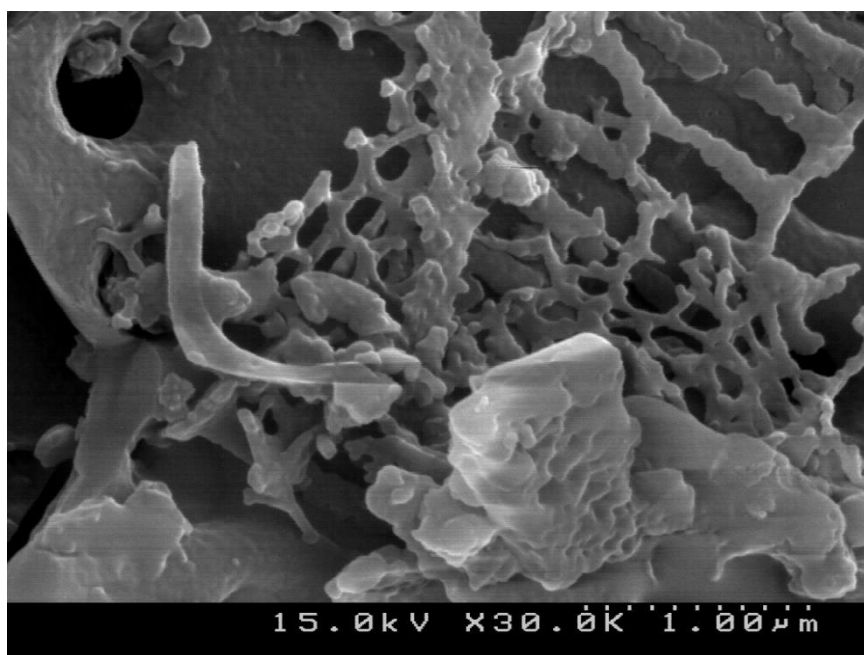

Figure S2. SEM image of 2% Eu-doped Y<sub>2</sub>O<sub>3</sub> coated biosilica.

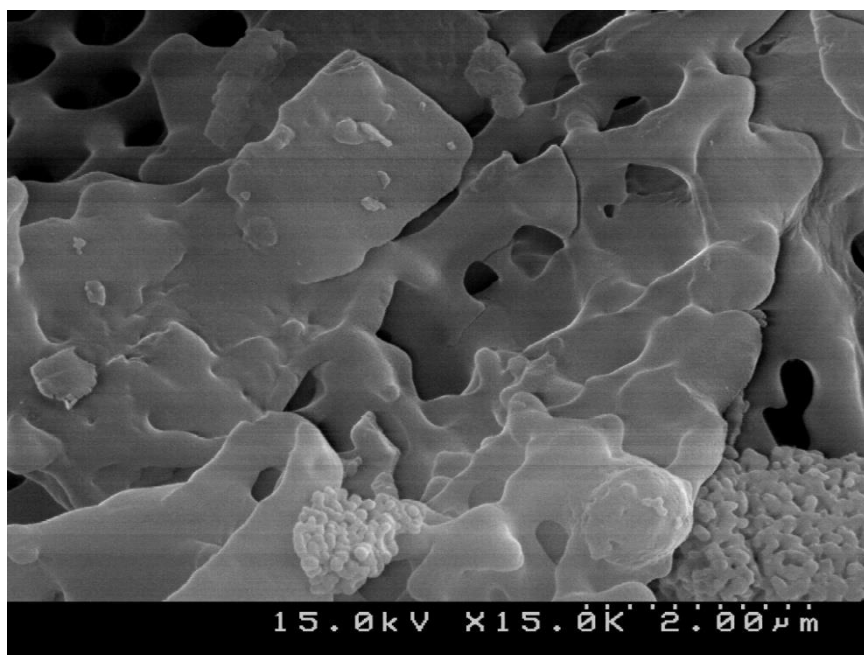

Figure S3. SEM image of 8% Eu-doped Y<sub>2</sub>O<sub>3</sub> coated biosilica.

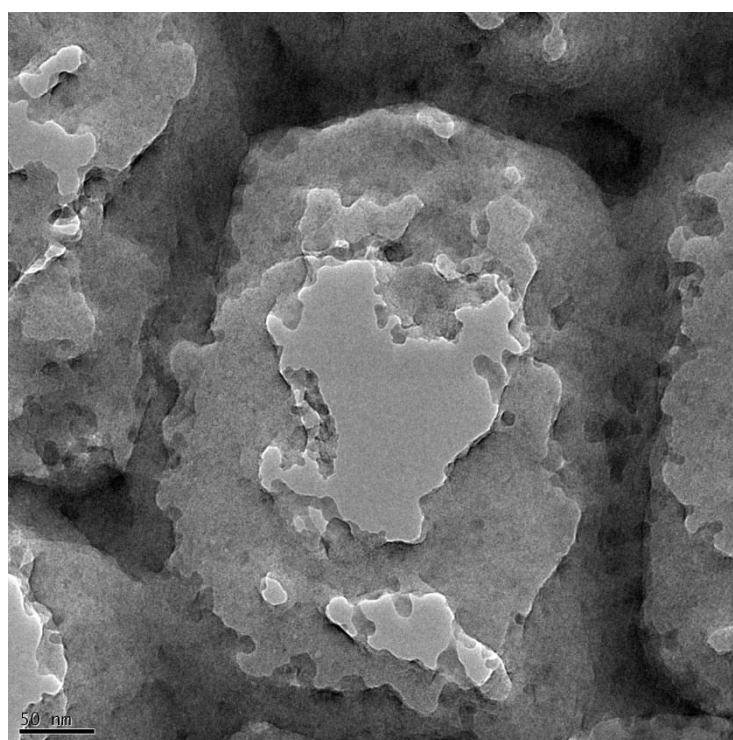

Figure S4. TEM image of 2% Eu-doped Y<sub>2</sub>O<sub>3</sub>-coated diatomite.

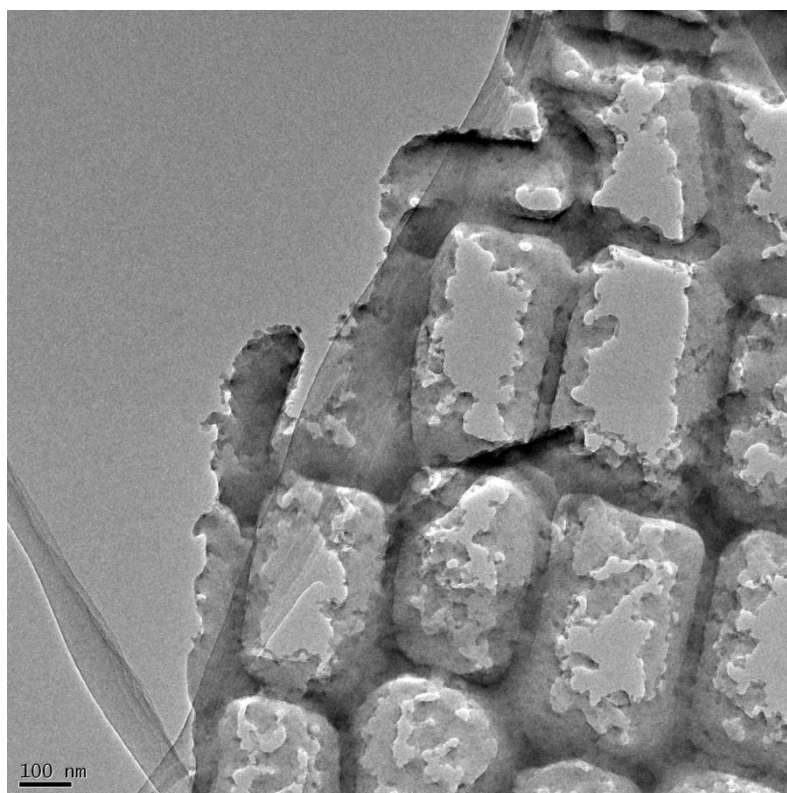

Figure S5. TEM image of 8% Eu-doped  $\text{Y}_2\text{O}_3$ -coated diatomite.

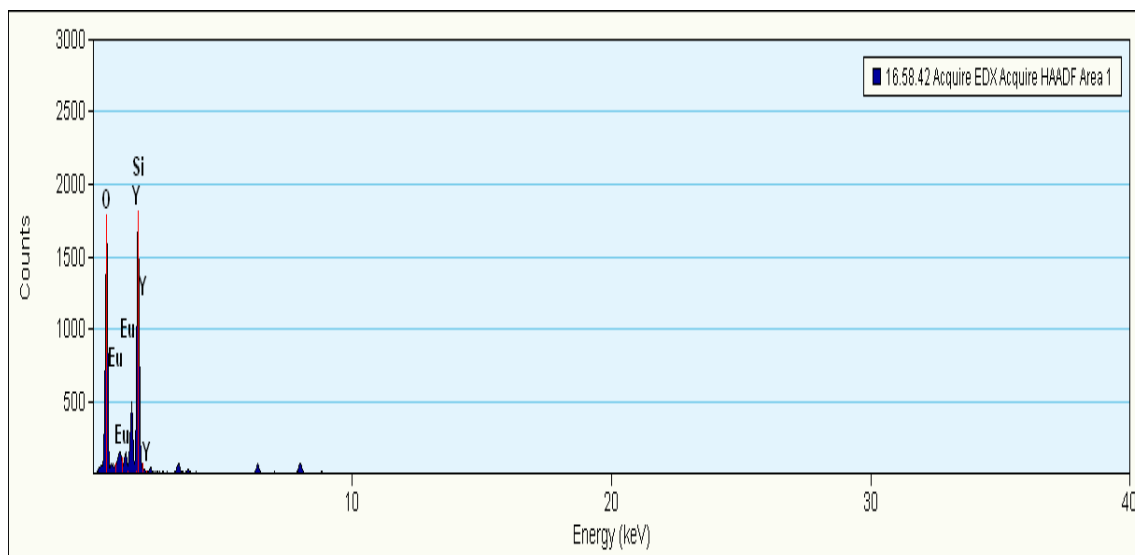

Figure S6. EDX spectra of 2% Eu-doped  $\text{Y}_2\text{O}_3$ -coated diatomite.

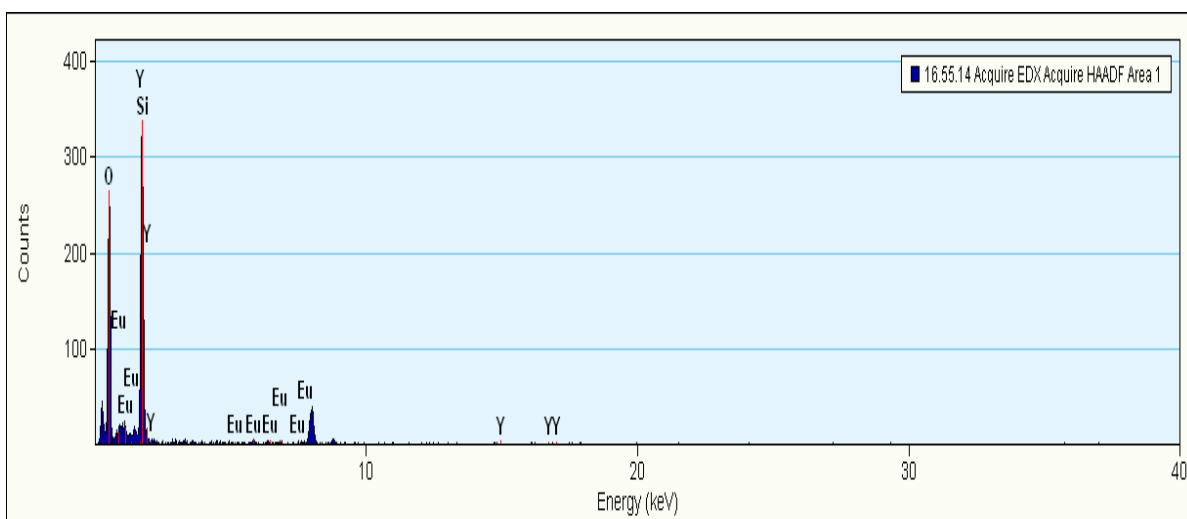

Figure S7. EDX spectra of 2% Eu-doped  $\text{Y}_2\text{O}_3$ -coated diatomite.

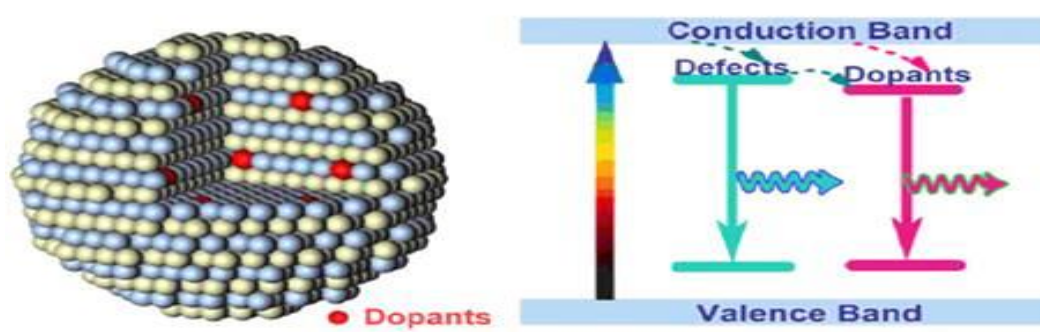

Figure S8. Schematic band-gap model for the luminescence of  $\text{Eu}^{3+}$  doped in  $\text{Y}_2\text{O}_3$ .
